# Supplementary material for: Identification of High-Risk Patients With Nonalcoholic Fatty Liver Disease Using Noninvasive Tests From Primary Care and Endocrinology Real-World Practices
Source: PubMed Central journal article supplement (PMC8032357; doi:10.14309/ctg.0000000000000340), 2021-04-06
Supplement: ct9-12-e00340-s001.pdf [file ct9-12-e00340-s001.pdf]

**Supplementary Table 1:** Clinicodemographic characteristics of patients based on Propensity Score

| Case-control by propensity score    | Linked               | Not linked            | Prob             | All                   |
|-------------------------------------|----------------------|-----------------------|------------------|-----------------------|
| N                                   | 103                  | 103                   |                  | 206                   |
| Male sex                            | 53 (51.5%)           | 54 (52.4%)            | 0.89             | 107 (51.9%)           |
| Age                                 | 68.3 ± 9.6           | 67.3 ± 10.0           | 0.66             | 67.8 ± 9.8            |
| Race                                |                      |                       |                  |                       |
| White                               | 60 (58.3%)           | 61 (59.2%)            | 0.89             | 121 (58.7%)           |
| Black                               | 30 (29.1%)           | 29 (28.2%)            | 0.88             | 59 (28.6%)            |
| Hispanic                            | 4 (3.9%)             | 4 (3.9%)              | 1.00             | 8 (3.9%)              |
| Asian                               | 5 (4.9%)             | 5 (4.9%)              | 1.00             | 10 (4.9%)             |
| Body Mass Index, kg/m <sup>2</sup>  | 31.4 ± 6.6           | 33.0 ± 7.0            | 0.12             | 32.2 ± 6.8            |
| Linked                              | 101 (98.1%)          | 0 (0.0%)              | <.0001           | 101 (49.0%)           |
| Diabetes                            | 56 (54.4%)           | 59 (57.3%)            | 0.67             | 115 (55.8%)           |
| Hyperlipidemia                      | 91 (88.3%)           | 96 (93.2%)            | 0.23             | 187 (90.8%)           |
| Hypertension                        | 85 (82.5%)           | 91 (88.3%)            | 0.24             | 176 (85.4%)           |
| History of Myocardial Infarction    | 9 (8.9%)             | 8 (7.8%)              | 0.77             | 17 (8.3%)             |
| History of Stroke                   | 4 (4.0%)             | 8 (7.9%)              | 0.23             | 12 (5.9%)             |
| History of Congestive Heart Failure | 1 (1.0%)             | 2 (1.9%)              | 0.56             | 3 (1.5%)              |
| History of Cancer                   | 24 (23.5%)           | 21 (20.6%)            | 0.61             | 45 (22.1%)            |
| Albumin, g/dl                       | 4.06 ± 0.34          | 4.02 ± 0.56           | 0.32             | 4.04 ± 0.46           |
| Alanine aminotransferase, IU/L      | 32.1 ± 30.6          | 24.0 ± 16.2           | 0.41             | 28.0 ± 24.7           |
| Aspartate aminotransferase, IU/L    | 32.1 ± 20.3          | 21.2 ± 8.2            | <.0001           | 26.7 ± 16.4           |
| Platelets, 10 <sup>3</sup> /UL      | 199.0 ± 44.7         | 260.7 ± 69.6          | <.0001           | 229.8 ± 66.1          |
| AST-to-platelet ratio (APRI)        | <b>0.419 ± 0.282</b> | <b>0.214 ± 0.093</b>  | <b>&lt;.0001</b> | <b>0.317 ± 0.233</b>  |
| Fibrosis-4 (FIB-4)                  | <b>2.07 ± 0.80</b>   | <b>1.23 ± 0.50</b>    | <b>&lt;.0001</b> | <b>1.65 ± 0.79</b>    |
| NAFLD Fibrosis Score                | <b>0.382 ± 0.996</b> | <b>-0.514 ± 1.389</b> | <b>&lt;.0001</b> | <b>-0.066 ± 1.287</b> |

Abbreviations: APRI: AST-to-platelet ratio, BMI: body mass index; FIB-4: Fibrosis-4
